# Supplementary material for: The effect of filter type and porosity on total suspended sediment determinations
Source: Royal Society of Chemistry journal article supplement (doi:10.1039/c8ay02134a), 2018-01-01
Supplement: c8ay02134a1.pdf [file c8ay02134a1.pdf]

## Electronic Supplementary Information

### Results

Total suspended solid concentrations were determined in 0.45/0.4  $\mu\text{m}$  filters in water samples from aquatic systems collected between (1) July 2011 and December 2012 (black circles in Fig. 1) and (2) June and July 2016 (black stars in Fig. 1). TSS values determined with cellulose ester membranes and glass fiber filters were highly correlated in both dataset (Sampling 1:  $r = 0.9895$ ,  $p < 0.0001$ ; Sampling 2:  $r = 0.9581$ ,  $p = 0.001$ ). The regression relationship indicates a slope close to one and similar y-intercepts (Sampling 1:  $[\text{TSS}]_{\text{cel}} = 0.70 + 0.97 \times [\text{TSS}]_{\text{gla}}$ ; Sampling 2:  $[\text{TSS}]_{\text{cel}} = 0.88 + 1.01 \times [\text{TSS}]_{\text{gla}}$ ). Since these two datasets showed similar results, they are shown together in the manuscript.
